# Supplementary material for: Experimental determination of Henry's law constants of difluoromethane (HFC-32) and the salting-out effects in aqueous salt solutions relevant to seawater
Source: Copernicus journal article supplement (doi:10.5194/acp-17-7495-2017), 2017-06-21
Supplement: Supplementary file 1 [file acp-17-7495-2017-supplement.pdf]

Supplement of Atmos. Chem. Phys., 17, 7495–7507, 2017  
<https://doi.org/10.5194/acp-17-7495-2017-supplement>  
© Author(s) 2017. This work is distributed under  
the Creative Commons Attribution 3.0 License.

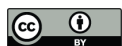

*Supplement of*

**Experimental determination of Henry's law constants  
of difluoromethane (HFC-32) and the salting-out effects  
in aqueous salt solutions relevant to seawater**

**Shuzo Kutsuna**

*Correspondence to:* Shuzo Kutsuna (s-kutsuna@aist.go.jp)

The copyright of individual parts of the supplement might differ from the CC BY 3.0 License.

10 S1. Equilibrium time for the PRV-HS method experiments

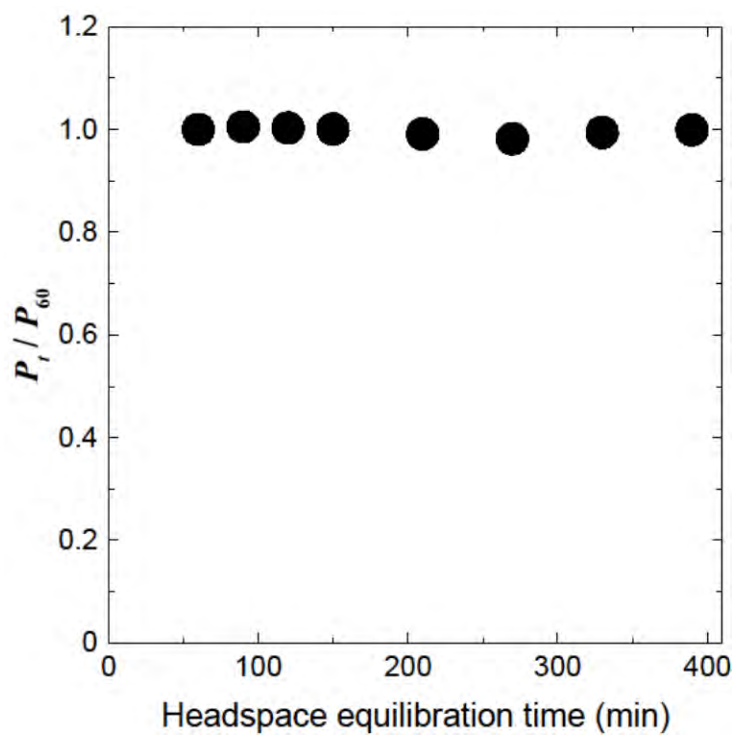

Figure S1. Relative areas of GC-MS peaks for  $\text{CH}_2\text{F}_2$  versus headspace time duration for equilibration of  $9.0 \text{ cm}^3$  of aqueous  $\text{CH}_2\text{F}_2$  at 353 K.

## S2. An example of the IGS method experiments

Figure S2 shows an example of time profile of  $P_t$  and how to calculate the  $k_1$  value for the IGS method experiments. The  $k_1$  value at each time was calculated by fitting nearest three data of  $P_t$  for each time. The average of the  $k_1$  values is given as the  $k_1$  value for the experimental run. Two standard deviation of the  $k_1$  values gives errors of the  $k_1$  value for the experimental run.

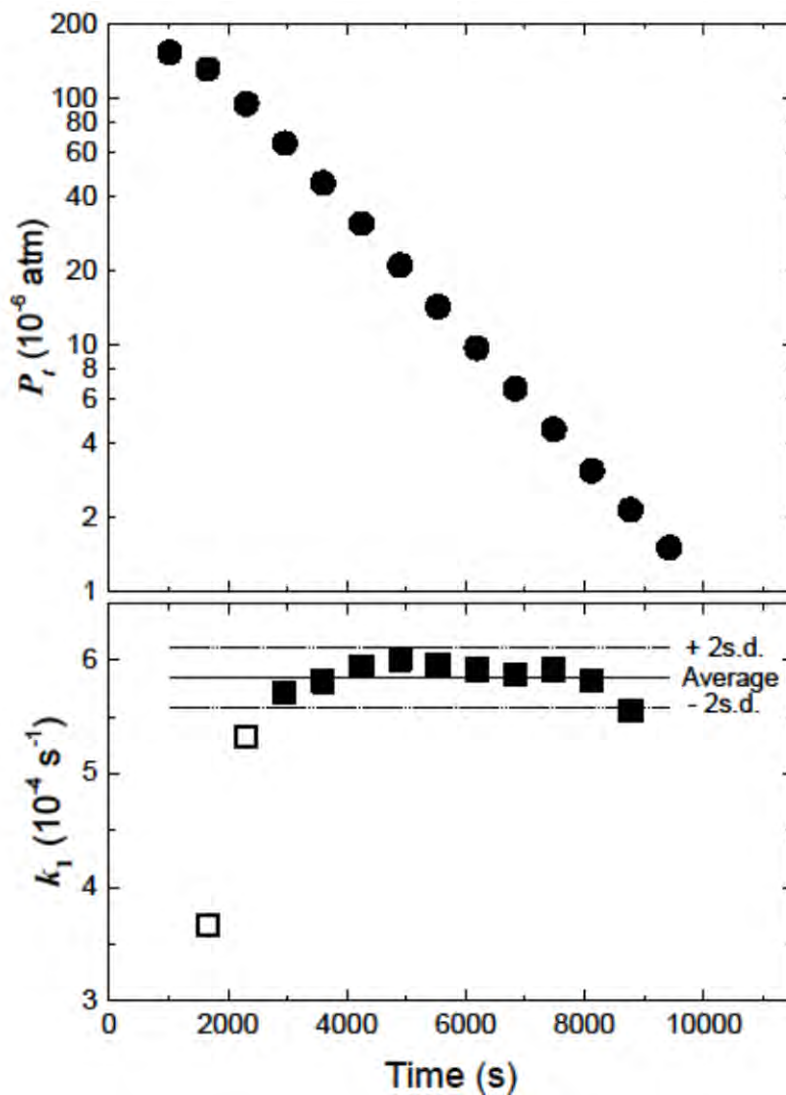

Figure S2. An IGS experimental result for  $V = 0.350$  dm $^3$  and  $F = 3.32 \times 10^{-4}$  dm $^3$  s $^{-1}$  at 25°C. (upper panel) time profile of  $P_t$ ; (lower panel) values of  $k_1$  calculated by fitting nearest three data of  $P_t$  for each time with respect to Eq. (1).

### S3. Results of the PRV-HS method experiments

Figure S3 illustrates the results of a PRV-HS experiment at 313 K. In panel A, peak area ( $S_{ij}$ ) is plotted against the volume of the  $\text{CH}_2\text{F}_2$  gas mixture added ( $v_j$ ) for  $V_i = 9.0, 7.5, 6.0, 4.5, 3.0,$  and  $1.5 \text{ cm}^3$ . For each  $V_i$ , the data form a straight line intersecting the origin, indicating that  $S_{ij}$  is proportional to  $v_j$  for vials with the same value of  $V_i$ . The slope ( $L_i$ ) of each line is obtained by linear regression with respect to Eq. (8), and the reciprocal of the slope ( $L_i^{-1}$ ) is plotted against the phase ratio ( $V_i/V_0$ ) in panel B of Fig. S3. Plots of  $L_i^{-1}$  and  $V_i/V_0$  obey Eq. (9). Table S1 lists the values of  $L_i^{-1}$ , the slopes and the intercepts for linear regression with respect to Eq. (9), and the  $K_{\text{H}}(T)$  values calculated from the slopes and the intercepts. Two measurements of  $K_{\text{H}}(T)$  were carried out at each temperature.

Furthermore, the  $K_{\text{H}}(T)$  values, along with errors of them at 95% confidence level, were also estimated by non-linear fitting of the two datasets simultaneously at each temperature by use of Eq. (11) (Fig. S4). The  $K_{\text{H}}(T)$  values and their errors thus estimated are plotted in Fig. 2 and are listed in Table S1.

**Table S1.  $L_i$  values for various  $V_i/V_0$  ratios at various temperatures, slopes and intercepts for linear regression with respect to Eq. (10),  $K_{\text{H}}(T)$  values calculated from the slopes and intercepts, and  $K_{\text{H}}(T)$  values and the errors at 95% confidence level estimated by non-linear fitting the two datasets simultaneously at each temperature (Fig. S4) with respect to Eq. (11).**

| $T$<br>(K) | $L_i$ (a.u.) <sup>a</sup> |             |             |             |             |             | Eq. (10)<br>Intercept | Eq. (10)<br>Slope | $K_{\text{H}}$ (M atm <sup>-1</sup> ) |                          |                       |
|------------|---------------------------|-------------|-------------|-------------|-------------|-------------|-----------------------|-------------------|---------------------------------------|--------------------------|-----------------------|
|            | $V_i/V = 0.421$           | 0.351       | 0.280       | 0.210       | 0.140       | 0.070       |                       |                   | Eq. (10)                              | Eq. (11) <sup>b, c</sup> | Eq. (13) <sup>b</sup> |
| 353        | 3.226±0.002               | 3.270±0.026 | 3.330±0.004 | 3.391±0.008 | 3.462±0.014 | 3.526±0.009 | 3.581                 | -0.870            | 0.026                                 | 0.027<br>±0.002          | 0.028<br>±0.003       |
|            | 2.044±0.006               | 2.050±0.012 | 2.112±0.010 | 2.132±0.009 | 2.186±0.021 | 2.209±0.011 | 2.248                 | -0.513            | 0.027                                 | (±0.003)                 |                       |
| 343        | 3.000±0.018               | 3.025±0.009 | 3.070±0.008 | 3.089±0.015 | 3.117±0.015 | 3.148±0.018 | 3.179                 | -0.423            | 0.031                                 | 0.031<br>±0.001          | 0.031<br>±0.002       |
|            | 1.949±0.004               | 1.955±0.005 | 1.968±0.003 | 1.998±0.004 | 2.020±0.002 | 2.030±0.009 | 2.050                 | -0.258            | 0.031                                 | (±0.002)                 |                       |
| 333        | 3.247±0.018               | 3.234±0.018 | 3.243±0.015 | 3.241±0.010 | 3.247±0.009 | 3.223±0.013 | 3.231                 | 0.034             | 0.037                                 | 0.036<br>±0.003          | 0.035<br>±0.002       |
|            | 3.080±0.009               | 3.044±0.006 | 3.082±0.005 | 3.127±0.009 | 3.113±0.008 | 3.134±0.014 | 3.149                 | -0.213            | 0.034                                 | (±0.004)                 |                       |
| 323        | 3.208±0.011               | 3.190±0.008 | 3.133±0.010 | 3.134±0.011 | 3.092±0.008 | 3.093±0.006 | 3.055                 | 0.355             | 0.042                                 | 0.043<br>±0.002          | 0.040<br>±0.001       |
|            | 3.357±0.010               | 3.289±0.014 | 3.275±0.005 | 3.233±0.004 | 3.226±0.016 | 3.160±0.001 | 3.135                 | 0.496             | 0.044                                 | (±0.004)                 |                       |
| 313        | 3.245±0.018               | 3.185±0.013 | 3.100±0.015 | 3.022±0.012 | 2.995±0.012 | 2.915±0.011 | 2.848                 | 0.935             | 0.052                                 | 0.052<br>±0.003          | 0.047<br>±0.001       |
|            | 2.162±0.031               | 2.134±0.010 | 2.060±0.014 | 2.029±0.018 | 1.992±0.010 | 1.925±0.018 | 1.896                 | 0.612             | 0.052                                 | (±0.005)                 |                       |

a. Errors are  $2\sigma$  for the regression only.; b. Errors are those at 95% confidence level for the regression only.; c. Number in parenthesis represents both errors at 95% confidence level for the regression and potential systematic bias ( $\pm 4\%$ ).

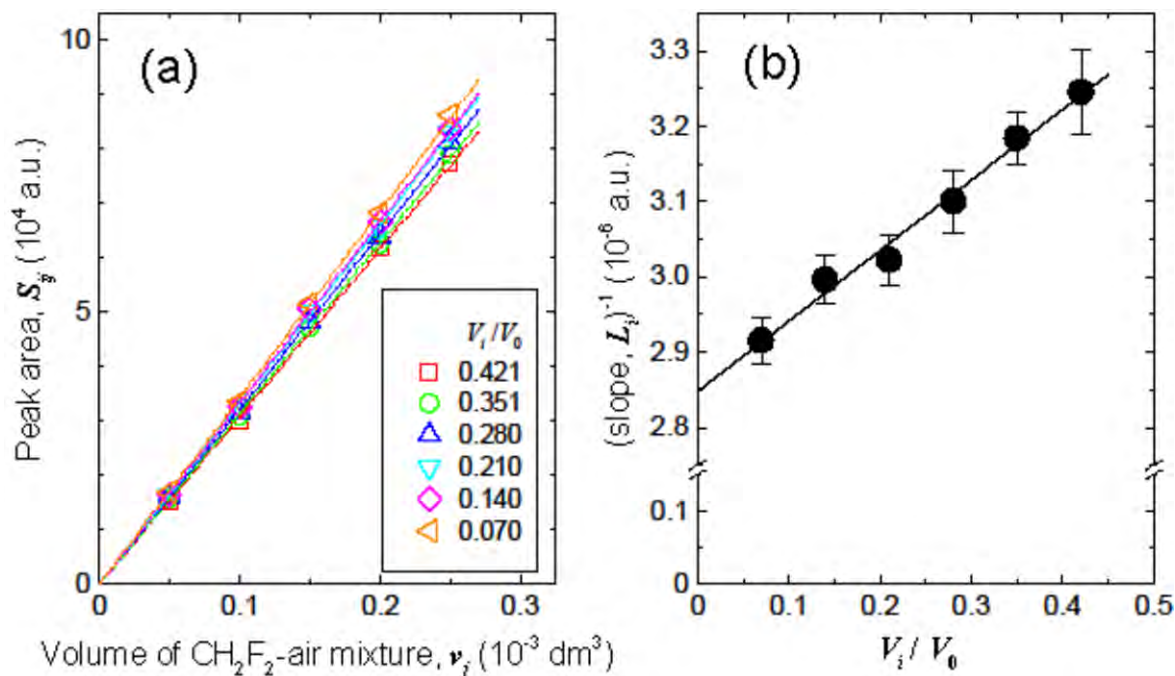

Figure S3. Headspace GC-MS measurements for six series of test samples containing water ( $V_i$  in  $\text{cm}^3$ ) to which a  $\text{CH}_2\text{F}_2$ -air mixture was added ( $v_j$  in  $\text{cm}^3$ ) at 313 K. (a) Plot of peak area ( $S_{ij}$ ) versus  $v_j$  for test samples containing volume  $V_i$  of water. Slope ( $L_i$ ) was obtained by linear fitting of the data to Eq. (8) for samples of the same  $V_i$ . (b) Plot of  $L_i^{-1}$  versus  $V_i/V_0$  fitted to Eq. (10).

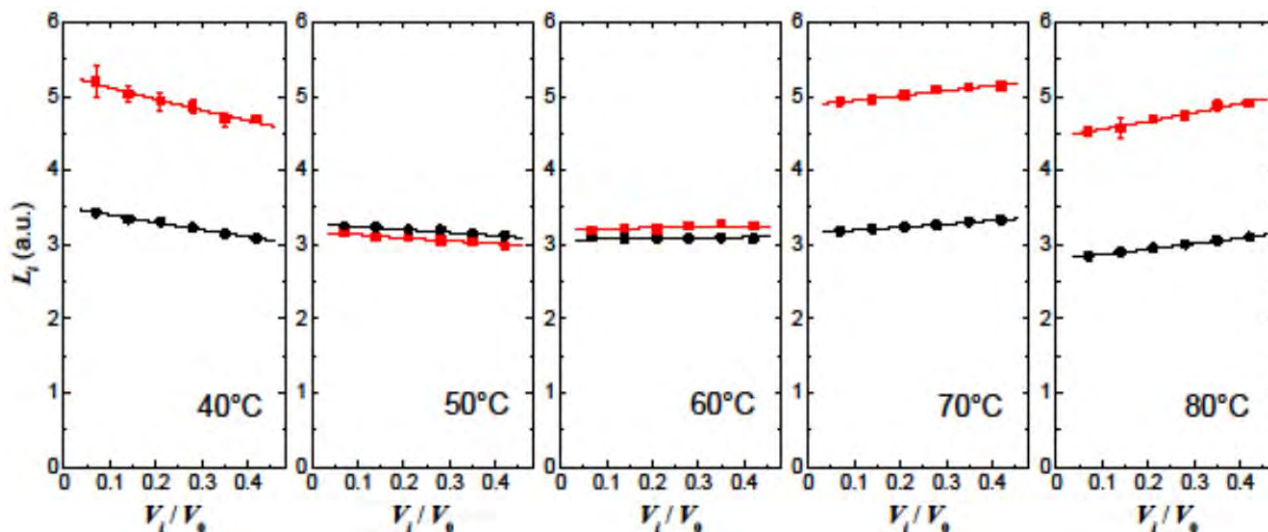

Figure S4. Plot of  $L_i$  versus  $V_i/V_0$  for the PRV-HS measurements at each temperature. Bold curves represent the simultaneous fitting of the two datasets at each temperature by Eq. (11).

#### S4. Determination of salting-out effects in artificial seawater

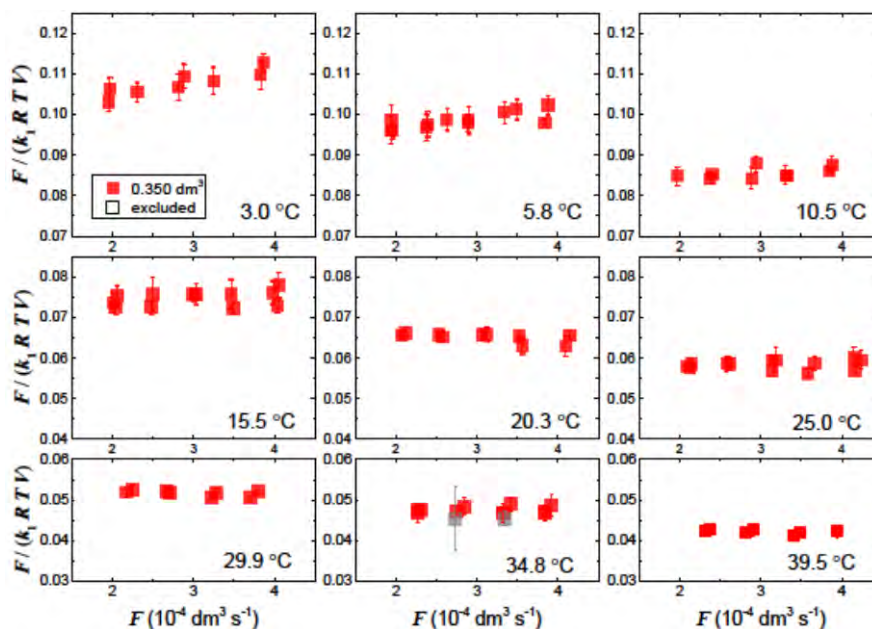

Figure S5. Plots of values of  $F/(k_1RTV)$  against  $F$  at each temperature for  $0.35 \text{ dm}^3$  of a-seawater at 4.452%. Error bars represent  $2\sigma$  due to errors of values of  $k_1$  as described in Sect. S2. Grey symbols represent the data excluded for calculating the average.

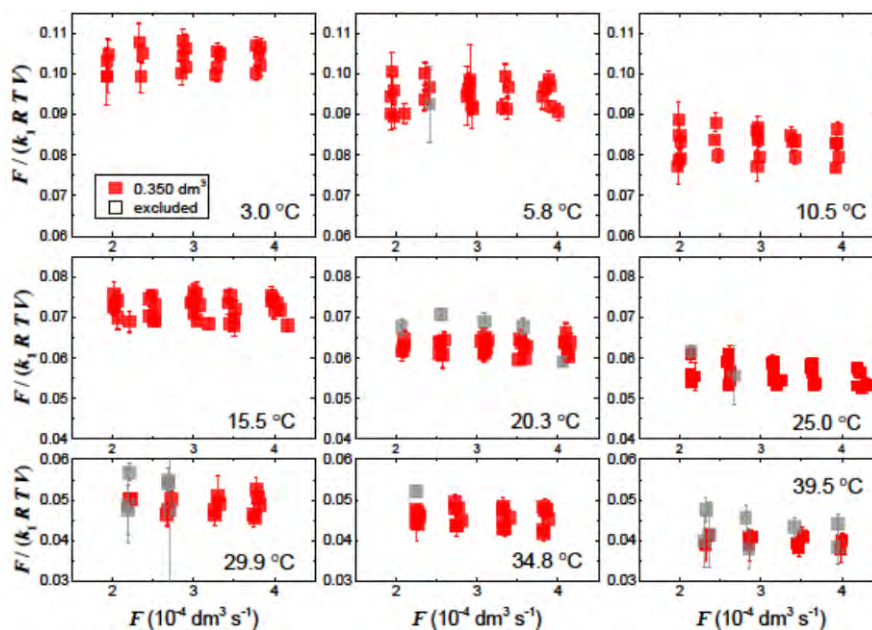

Figure S6. Plots of values of  $F/(k_1RTV)$  against  $F$  at each temperature for  $0.35 \text{ dm}^3$  of a-seawater at 8.921%. Error bars represent  $2\sigma$  due to errors of values of  $k_1$  as described in Sect. S2. Grey symbols represent the data excluded for calculating the average.

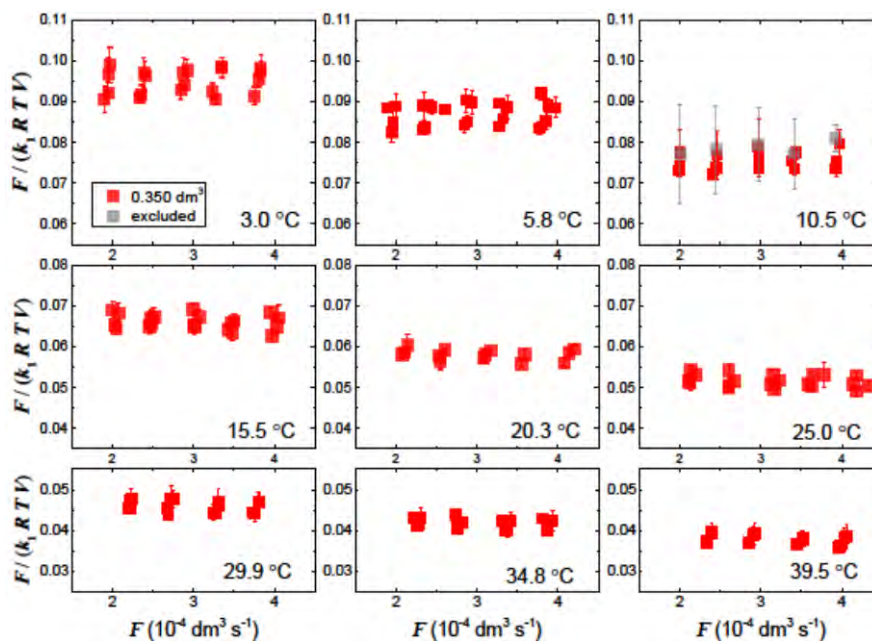

Figure S7. Plots of values of  $F/(k_1RTV)$  against  $F$  at each temperature for  $0.35 \text{ dm}^3$  of a-seawater at 21.520%. Error bars represent  $2\sigma$  due to errors of values of  $k_1$  as described in Sect. S2. Grey symbols represent the data excluded for calculating the average.

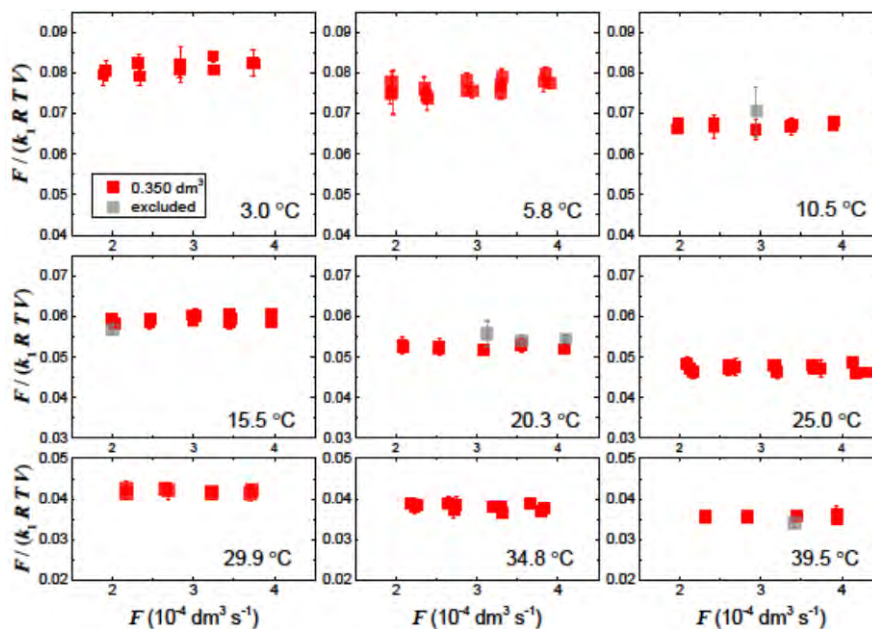

Figure S8. Plots of values of  $F/(k_1RTV)$  against  $F$  at each temperature for  $0.35 \text{ dm}^3$  of a-seawater at 51.534%. Error bars represent  $2\sigma$  due to errors of values of  $k_1$  as described in Sect. S2. Grey symbols represent the data excluded for calculating the average.

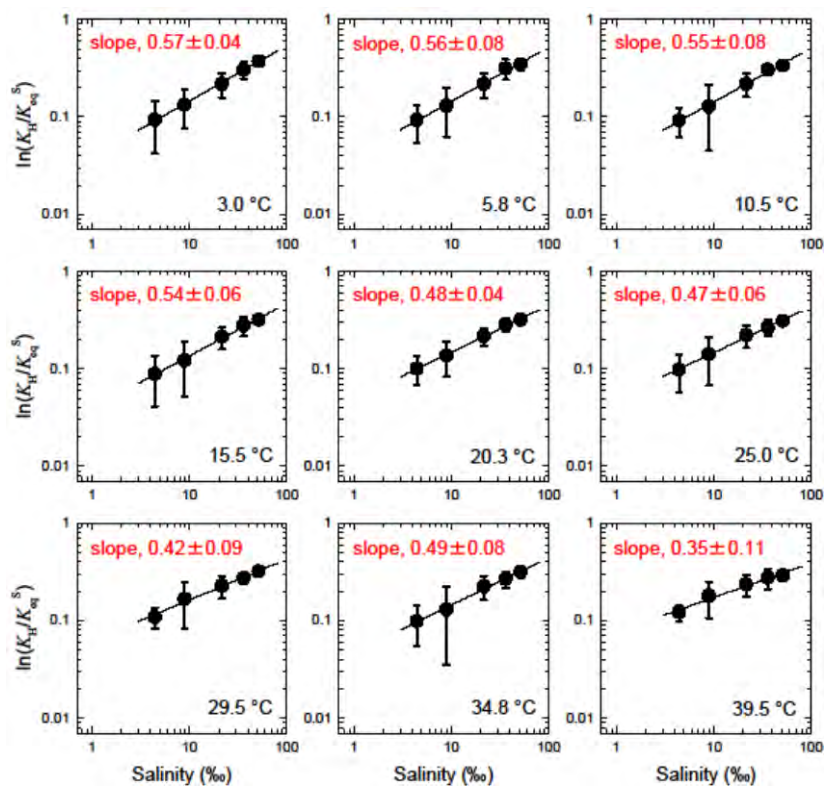

Figure S9. log-log plots for  $\ln(K_H(T)/K_{eq}^S(T))$  vs. salinity in a-seawater at each temperature. Bold lines represent the fitting obtained by a liner regression. Errors are those at 95% confidence level for the regression only.

5 Table S2. Values of  $k_s$  (Eq. (17)) and comparison of values of  $K_{eq}^S$  calculated at each temperature by Eq. (17) with those by Eq. (22).

| Temperature<br>(°C) | $k_s$<br>(‰ <sup>-1</sup> ) | $[K_{eq}^S \text{ from Eq. (17)}] / [K_{eq}^S \text{ from Eq. (22)}]$ |        |        | $[K_{eq}^S \text{ at } 30\text{‰}] / [K_{eq}^S \text{ at } 40\text{‰}]$ |          |
|---------------------|-----------------------------|-----------------------------------------------------------------------|--------|--------|-------------------------------------------------------------------------|----------|
|                     |                             | at 30‰                                                                | at 35‰ | at 40‰ | Eq. (17)                                                                | Eq. (22) |
| 3.0                 | 0.00811                     | 1.027                                                                 | 1.008  | 0.988  | 1.084                                                                   | 1.043    |
| 5.8                 | 0.00785                     | 1.033                                                                 | 1.014  | 0.995  | 1.082                                                                   | 1.042    |
| 10.5                | 0.00768                     | 1.033                                                                 | 1.016  | 0.997  | 1.080                                                                   | 1.042    |
| 15.5                | 0.00718                     | 1.044                                                                 | 1.028  | 1.012  | 1.074                                                                   | 1.041    |
| 20.3                | 0.00728                     | 1.037                                                                 | 1.020  | 1.003  | 1.076                                                                   | 1.040    |
| 25.0                | 0.00704                     | 1.040                                                                 | 1.024  | 1.008  | 1.073                                                                   | 1.039    |
| 29.9                | 0.00731                     | 1.027                                                                 | 1.010  | 0.992  | 1.076                                                                   | 1.039    |
| 34.8                | 0.00713                     | 1.029                                                                 | 1.012  | 0.995  | 1.074                                                                   | 1.038    |
| 39.5                | 0.00709                     | 1.026                                                                 | 1.010  | 0.992  | 1.073                                                                   | 1.038    |



## S5. Discussion of potential reason for this salting-out effect of CH<sub>2</sub>F<sub>2</sub> solubility in a-seawater (deviation from Sechenov relationship)

The reason that the salting-out effect of CH<sub>2</sub>F<sub>2</sub> solubility in a-seawater depends on  $S^{0.5}$  is not clear. Specific properties of CH<sub>2</sub>F<sub>2</sub> –small molecular volume, which results in small work of cavity creation (Graziano, 2004; 2008), and large solute-solvent attractive potential energy in water and a-seawater– may cause deviation from Sechenov relationship. This possibility may be discussed here.

I calculate Ben-Naim standard Gibbs energy  $\Delta G^\circ$ , enthalpy  $\Delta H^\circ$ , and entropy  $\Delta S^\circ$  changes for dissolution of CH<sub>2</sub>F<sub>2</sub> in water because these values correspond to the values for the transfer from a fixed position in the gas phase to a fixed position in water. Values of  $\Delta G^\circ$ ,  $\Delta H^\circ$ , and  $\Delta S^\circ$  are calculated on the basis of the Ostwald solubility coefficient,  $L(T)$ , as follows.

$$\ln(L(T)) = \ln\left(RTK_{\text{eq}}^S(T)\right) \quad (\text{B1})$$

$$\Delta G^\circ = R'T \ln(L(T)) \quad (\text{B2})$$

$$\Delta H^\circ = -\frac{\partial}{\partial(1/T)}\left(\frac{\Delta G^\circ}{T}\right) \quad (\text{B3})$$

$$\Delta S^\circ = \frac{\Delta H^\circ - \Delta G^\circ}{T} \quad (\text{B4})$$

where both  $R$  and  $R'$  represent gas constant but their units are different:  $R = 0.0821$  in  $\text{atm dm}^3 \text{ K}^{-1} \text{ mol}^{-1}$ ;  $R' = 8.314$  in  $\text{J K}^{-1} \text{ mol}^{-1}$ .

Combining Eqs. (B1), (B2), (B3), and (B4) with Eqs. (14) and (15),  $\Delta G^\circ$  ( $\text{kJ mol}^{-1}$ ),  $\Delta H^\circ$  ( $\text{kJ mol}^{-1}$ ), and  $\Delta S^\circ$  ( $\text{J mol}^{-1} \text{ K}^{-1}$ ) are represented by  $\Delta G_{\text{sol}}$  and  $\Delta H_{\text{sol}}$  as follows:

$$\Delta G^\circ = \Delta G_{\text{sol}} + R'T \ln(RT) \quad (\text{B5})$$

$$\Delta H^\circ = \Delta H_{\text{sol}} + R'T \quad (\text{B6})$$

$$\Delta S^\circ = \frac{\Delta H_{\text{sol}} - \Delta G_{\text{sol}}}{T} + R' - R' \ln(RT) \quad (\text{B7})$$

Values of  $\Delta G^\circ$ ,  $\Delta H^\circ$ , and  $\Delta S^\circ$  calculated at 298 K are listed in Table S3. Table S3 also lists values of  $\Delta G^\circ$ ,  $\Delta H^\circ$ , and  $\Delta S^\circ$  reported for CH<sub>3</sub>F and C<sub>2</sub>H<sub>6</sub> (Graziano, 2004) and CH<sub>4</sub> (Graziano, 2008) at 298 K. The chemicals, which having a methyl group, in Table S3 are classified into two groups (CH<sub>2</sub>F<sub>2</sub> and CH<sub>3</sub>F; CH<sub>4</sub> and C<sub>2</sub>H<sub>6</sub>) according to  $\Delta G^\circ$ .

Table S3 lists values of  $\Delta G_c$ ,  $E_a$  and  $\Delta H^h$  deduced using a scaled particle theory (Graziano, 2004; 2008).  $\Delta G_c$  is the work of cavity creation to insert a solute in a solvent.  $E_a$  is a solute-solvent attractive potential energy and accounts for the solute-solvent interactions consisting of dispersion, dipole-induced dipole, and dipole-dipole contributions.  $\Delta H^h$  is enthalpy of solvent molecules reorganization caused by solute insertion. The solvent reorganization mainly involves a rearrangement of H-bonds.

$\Delta G_c$  is entropic in nature in all liquids, being a measure of the excluded volume effect due to a reduction in the spatial configurations accessible to liquid molecules upon cavity creation. Hence, C<sub>2</sub>H<sub>6</sub> has larger value of  $\Delta G_c$  than CH<sub>3</sub>F and CH<sub>4</sub>.  $\Delta G_c$ ,  $E_a$ , and  $\Delta H^h$  are related to  $\Delta G^\circ$  and  $\Delta H^\circ$  as follows (Graziano, 2008):

$$\Delta G^{\circ} = \Delta G_c + E_a \quad (\text{B8})$$

$$\Delta H^{\circ} = E_a + \Delta H^h \quad (\text{B9})$$

Table S3 thus suggests that smaller value of  $\Delta G^{\circ}$  of  $\text{CH}_3\text{F}$  than  $\text{CH}_4$  is due to large solute-solvent attractive potential energy ( $-E_a$ ) of  $\text{CH}_3\text{F}$ .

5

**Table S3. Ben-Naim standard hydration Gibbs energy  $\Delta G^{\circ}$ , enthalpy  $\Delta H^{\circ}$ , and entropy  $\Delta S^{\circ}$  changes for dissolution of  $\text{CH}_2\text{F}_2$  at 298 K determined here and the corresponding values and values of  $\Delta G_c$ ,  $E_a$  and  $\Delta H^h$  reported for  $\text{CH}_3\text{F}$  and  $\text{C}_2\text{H}_6$  (Granziano, 2004) and  $\text{CH}_4$  (Graziano, 2008).**

|                         | $\Delta G^{\circ}$<br>(kJ mol <sup>-1</sup> ) | $\Delta H^{\circ}$<br>(kJ mol <sup>-1</sup> ) | $\Delta S^{\circ}$<br>(J K <sup>-1</sup> mol <sup>-1</sup> ) | $\Delta G_c$<br>(kJ mol <sup>-1</sup> ) | $E_a$<br>(kJ mol <sup>-1</sup> ) | $\Delta H^h$<br>(kJ mol <sup>-1</sup> ) |
|-------------------------|-----------------------------------------------|-----------------------------------------------|--------------------------------------------------------------|-----------------------------------------|----------------------------------|-----------------------------------------|
| $\text{CH}_2\text{F}_2$ | -1.1                                          | -14.7                                         | -45.4                                                        |                                         |                                  |                                         |
| $\text{CH}_3\text{F}$   | -0.9                                          | -15.8                                         | -50.0                                                        | 23.3                                    | -24.3                            | 8.5                                     |
| $\text{CH}_4$           | 8.4                                           | -10.9                                         | -64.7                                                        | 22.9                                    | -14.5                            | 3.7                                     |
| $\text{C}_2\text{H}_6$  | 7.7                                           | -17.5                                         | -84.5                                                        | 28.4                                    | -20.7                            | 3.2                                     |

10 Graziano (2008) definitively explained the salting-out of  $\text{CH}_4$  by sodium chloride at molecular level on the basis of a scaled particle theory. He explained that  $\Delta G_c$  increase was linearly related to the increase in the volume packing density of the solutions ( $\zeta_3$ ) with adding NaCl. Such an increase of  $\Delta G_c$  is probably the case for salting-out of  $\text{CH}_2\text{F}_2$  by a-seawater observed in this study. He also explained that  $E_a$  was linearly related to the increase in  $\zeta_3$  assuming that a fraction of the dipole-induced dipole attractions could be taken into account by the parameterization of the dispersion contribution.

15 I think the possibility that  $E_a$  may be nonlinearly related to the increase in  $\zeta_3$  because of dipole-dipole interaction between  $\text{CH}_2\text{F}_2$  and solvents. Temperature dependence in Eq. (22) suggests that salting-out effect of  $\text{CH}_2\text{F}_2$  by a-seawater is enthalpic. Eqs. (22) and (B9) thus suggests that the salting-out of  $\text{CH}_2\text{F}_2$  is mostly related to change in  $E_a$ .  $\text{CH}_2\text{F}_2$  has relatively small value of  $\Delta G_c$  because of its small molecular volume compared to other chemicals such as  $\text{C}_2\text{H}_6$ . Accordingly,  $\Delta G^{\circ}$ , that is, solubility of  $\text{CH}_2\text{F}_2$  would depend on  $E_a$  rather than  $\Delta G_c$ . Therefore, I think that specific properties of  $\text{CH}_2\text{F}_2$  –  
 20 small molecular volume, which results in small work of cavity creation (Graziano, 2004; 2008), and large solute-solvent attractive potential energy in water and a-seawater– may cause deviation from Sechenov relationship.

## References

- Graziano, G.: Case study of enthalpy–entropy noncompensation. *Journal of Chemical Physics*, 120, 4467-4471, doi: 10.1063/1.1644094, 2004.
- 25 Graziano, G.: Salting out of methane by sodium chloride: A scaled particle theory study. *Journal of Chemical Physics*, 129, 084506, doi: 10.1063/1.2972979, 2008.

**S6. Estimated results (Sect. 3.3) for monthly amount of CH<sub>2</sub>F<sub>2</sub> dissolved in the ocean mixed layer at solubility equilibrium with the atmospheric CH<sub>2</sub>F<sub>2</sub> (1 patm) and the depth distribution of the CH<sub>2</sub>F<sub>2</sub> dissolved in each semi-hemisphere**

5 **Table S4. Monthly amount of CH<sub>2</sub>F<sub>2</sub> dissolved in the ocean mixed layer at solubility equilibrium with the atmospheric CH<sub>2</sub>F<sub>2</sub> (partial pressure, 1 patm) and the depth distribution of the CH<sub>2</sub>F<sub>2</sub> dissolved in the southern semi-hemisphere (90° S - 30° S).**

|           | Amount<br>(Gg patm <sup>-1</sup> ) | Distribution of the amount of CH <sub>2</sub> F <sub>2</sub> dissolved in the ocean mixed layer<br>with respect to the ocean mixed layer depth (%) |             |             |             |             |             |
|-----------|------------------------------------|----------------------------------------------------------------------------------------------------------------------------------------------------|-------------|-------------|-------------|-------------|-------------|
|           |                                    | 10 - 100 m                                                                                                                                         | 100 - 200 m | 200 - 300 m | 300 - 400 m | 400 - 500 m | 500 - 600 m |
| January   | 0.0169                             | 94.9                                                                                                                                               | 2.9         | 1.0         | 0.5         | 0.3         | 0.3         |
| February  | 0.0201                             | 92.1                                                                                                                                               | 3.6         | 2.9         | 1.0         | 0.3         | 0.0         |
| March     | 0.0255                             | 87.8                                                                                                                                               | 9.2         | 1.7         | 0.7         | 0.2         | 0.4         |
| April     | 0.0338                             | 66.5                                                                                                                                               | 31.8        | 1.1         | 0.2         | 0.1         | 0.2         |
| May       | 0.0409                             | 48.5                                                                                                                                               | 48.1        | 2.2         | 0.8         | 0.3         | 0.0         |
| June      | 0.0510                             | 26.8                                                                                                                                               | 62.7        | 8.0         | 1.7         | 0.8         | 0.1         |
| July      | 0.0571                             | 14.1                                                                                                                                               | 69.3        | 12.2        | 3.3         | 0.9         | 0.1         |
| August    | 0.0640                             | 8.5                                                                                                                                                | 65.8        | 17.0        | 6.2         | 2.3         | 0.2         |
| September | 0.0609                             | 13.5                                                                                                                                               | 61.0        | 14.6        | 8.2         | 2.7         | 0.0         |
| October   | 0.0504                             | 24.7                                                                                                                                               | 58.6        | 12.1        | 2.9         | 1.4         | 0.3         |
| November  | 0.0335                             | 60.4                                                                                                                                               | 30.5        | 4.6         | 2.2         | 2.3         | 0.1         |
| December  | 0.0196                             | 95.1                                                                                                                                               | 4.3         | 0.4         | 0.2         | 0.0         | 0.0         |

**Table S5. Monthly amount of CH<sub>2</sub>F<sub>2</sub> dissolved in the ocean mixed layer at solubility equilibrium with the atmospheric CH<sub>2</sub>F<sub>2</sub> (partial pressure, 1 patm) and the depth distribution of the CH<sub>2</sub>F<sub>2</sub> dissolved in the southern semi-hemisphere (30° S - 0° S).**

|           | Amount<br>(Gg patm <sup>-1</sup> ) | Distribution of the amount of CH <sub>2</sub> F <sub>2</sub> dissolved in the ocean mixed layer<br>with respect to the ocean mixed layer depth (%) |             |             |             |             |             |
|-----------|------------------------------------|----------------------------------------------------------------------------------------------------------------------------------------------------|-------------|-------------|-------------|-------------|-------------|
|           |                                    | 10 - 100 m                                                                                                                                         | 100 - 200 m | 200 - 300 m | 300 - 400 m | 400 - 500 m | 500 - 600 m |
| January   | 0.0084                             | 99.6                                                                                                                                               | 0.4         | 0           | 0           | 0           | 0           |
| February  | 0.0084                             | 99.7                                                                                                                                               | 0.3         | 0           | 0           | 0           | 0           |
| March     | 0.0089                             | 100.0                                                                                                                                              | 0           | 0           | 0           | 0           | 0           |
| April     | 0.0106                             | 100.0                                                                                                                                              | 0           | 0           | 0           | 0           | 0           |
| May       | 0.0131                             | 100.0                                                                                                                                              | 0           | 0           | 0           | 0           | 0           |
| June      | 0.0163                             | 97.1                                                                                                                                               | 2.9         | 0           | 0           | 0           | 0           |
| July      | 0.0189                             | 80.1                                                                                                                                               | 19.9        | 0           | 0           | 0           | 0           |
| August    | 0.0193                             | 73.1                                                                                                                                               | 26.9        | 0           | 0           | 0           | 0           |
| September | 0.0165                             | 82.2                                                                                                                                               | 17.8        | 0           | 0           | 0           | 0           |
| October   | 0.0124                             | 94.6                                                                                                                                               | 5.4         | 0           | 0           | 0           | 0           |
| November  | 0.0097                             | 99.9                                                                                                                                               | 0.1         | 0           | 0           | 0           | 0           |
| December  | 0.0087                             | 100.0                                                                                                                                              | 0           | 0           | 0           | 0           | 0           |

**Table S6. Monthly amount of CH<sub>2</sub>F<sub>2</sub> dissolved in the ocean mixed layer at solubility equilibrium with the atmospheric CH<sub>2</sub>F<sub>2</sub> (partial pressure, 1 patm) and the depth distribution of the CH<sub>2</sub>F<sub>2</sub> dissolved in the northern semi-hemisphere (0° N - 30° N).**

|           | Amount<br>(Gg patm <sup>-1</sup> ) | Distribution of the amount of CH <sub>2</sub> F <sub>2</sub> dissolved in the ocean mixed layer<br>with respect to the ocean mixed layer depth (%) |             |             |             |             |             |
|-----------|------------------------------------|----------------------------------------------------------------------------------------------------------------------------------------------------|-------------|-------------|-------------|-------------|-------------|
|           |                                    | 10 - 100 m                                                                                                                                         | 100 - 200 m | 200 - 300 m | 300 - 400 m | 400 - 500 m | 500 - 600 m |
| January   | 0.0132                             | 96.4                                                                                                                                               | 3.6         | 0           | 0           | 0           | 0           |
| February  | 0.0126                             | 95.9                                                                                                                                               | 4.1         | 0           | 0           | 0           | 0           |
| March     | 0.0107                             | 98.7                                                                                                                                               | 1.3         | 0           | 0           | 0           | 0           |
| April     | 0.0087                             | 99.8                                                                                                                                               | 0.2         | 0           | 0           | 0           | 0           |
| May       | 0.0079                             | 100.0                                                                                                                                              | 0           | 0           | 0           | 0           | 0           |
| June      | 0.0080                             | 100.0                                                                                                                                              | 0           | 0           | 0           | 0           | 0           |
| July      | 0.0084                             | 100.0                                                                                                                                              | 0           | 0           | 0           | 0           | 0           |
| August    | 0.0082                             | 100.0                                                                                                                                              | 0           | 0           | 0           | 0           | 0           |
| September | 0.0080                             | 100.0                                                                                                                                              | 0           | 0           | 0           | 0           | 0           |
| October   | 0.0086                             | 100.0                                                                                                                                              | 0           | 0           | 0           | 0           | 0           |
| November  | 0.0100                             | 100.0                                                                                                                                              | 0           | 0           | 0           | 0           | 0           |
| December  | 0.0118                             | 100.0                                                                                                                                              | 0           | 0           | 0           | 0           | 0           |

**5 Table S7. Monthly amount of CH<sub>2</sub>F<sub>2</sub> dissolved in the ocean mixed layer at solubility equilibrium with the atmospheric CH<sub>2</sub>F<sub>2</sub> (partial pressure, 1 patm) and the depth distribution of the CH<sub>2</sub>F<sub>2</sub> dissolved in the northern semi-hemisphere (30° N - 90° N).**

|           | Amount<br>(Gg patm <sup>-1</sup> ) | Distribution of the amount of CH <sub>2</sub> F <sub>2</sub> dissolved in the ocean mixed layer<br>with respect to the ocean mixed layer depth (%) |             |             |             |             |             |
|-----------|------------------------------------|----------------------------------------------------------------------------------------------------------------------------------------------------|-------------|-------------|-------------|-------------|-------------|
|           |                                    | 10 - 100 m                                                                                                                                         | 100 - 200 m | 200 - 300 m | 300 - 400 m | 400 - 500 m | 500 - 600 m |
| January   | 0.0205                             | 41.3                                                                                                                                               | 50.1        | 7.0         | 1.4         | 0.2         | 0.0         |
| February  | 0.0225                             | 34.5                                                                                                                                               | 55.3        | 7.1         | 2.3         | 0.6         | 0.2         |
| March     | 0.0208                             | 49.7                                                                                                                                               | 42.3        | 4.9         | 1.7         | 0.7         | 0.6         |
| April     | 0.0147                             | 79.7                                                                                                                                               | 17.6        | 1.7         | 0.4         | 0.0         | 0.6         |
| May       | 0.0081                             | 90.1                                                                                                                                               | 9.9         | 0           | 0           | 0           | 0           |
| June      | 0.0055                             | 97.7                                                                                                                                               | 2.3         | 0           | 0           | 0           | 0           |
| July      | 0.0045                             | 96.6                                                                                                                                               | 3.4         | 0           | 0           | 0           | 0           |
| August    | 0.0048                             | 94.4                                                                                                                                               | 5.6         | 0           | 0           | 0           | 0           |
| September | 0.0059                             | 97.7                                                                                                                                               | 2.3         | 0           | 0           | 0           | 0           |
| October   | 0.0084                             | 99.6                                                                                                                                               | 0.4         | 0           | 0           | 0           | 0           |
| November  | 0.0121                             | 89.6                                                                                                                                               | 10.4        | 0.1         | 0           | 0           | 0           |
| December  | 0.0163                             | 71.0                                                                                                                                               | 26.1        | 2.9         | 0           | 0           | 0           |
